# Supplementary material for: Amphiphysin I cleavage by asparagine endopeptidase leads to tau hyperphosphorylation and synaptic dysfunction
Source: eLife. 2021 May 21;10:e65301. doi: 10.7554/eLife.65301 (PMC8139826; doi:10.7554/eLife.65301)
Supplement: Figure 1—source data 1. [file elife-65301-fig1-data1.xlsx]

## Sheet: Sheet1
Source data for Figure 1, panel e. AEP activity assay in the cell lysates transfected with WT and mutant AEP. Each column is an independent experiment.
time	Ctr			myc-AEP WT			myc-AEP C189S
	A:Y1	A:Y2	A:Y3	B:Y1	B:Y2	B:Y3	C:Y1	C:Y2	C:Y3
0	2701584	2181158	6761880	6320998	3401536	6121002	7807900	988323	3250026
5	6528798	3875346	12211974	12242318	10018728	8628296	8311814	1693958	2867576
10	6783470	6524532	6462330	22354584	20237008	19444464	9872652	3227458	4672166
15	9224746	8896280	9411042	32387080	29246424	25954096	11670424	5100870	7537202
20	11377026	11199802	15689838	41026752	36536960	34959700	13807634	7376980	9168146
25	13262348	13179150	20415848	47976976	42634288	43272400	15728744	9526626	12007940
30	15478136	15211656	23994664	53239360	48450124	44695940	17916066	12013270	16005726
35	17407904	17005118	24872908	59074408	53520832	52584840	20021604	14214982	16799374
40	19257872	18855104	28935032	63649600	58372552	62449344	22168392	16443420	19854892
45	21168756	20755880	31486440	68701808	62397056	68712552	24370536	18548058	22408316
