# Supplementary material for: Amphiphysin I cleavage by asparagine endopeptidase leads to tau hyperphosphorylation and synaptic dysfunction
Source: eLife. 2021 May 21;10:e65301. doi: 10.7554/eLife.65301 (PMC8139826; doi:10.7554/eLife.65301)
Supplement: Figure 2—figure supplement 2—source data 1. [file elife-65301-fig2-figsupp2-data1.xlsx]

## Sheet: Sheet1
Source data for Figure 2-supplementary 2, panel b. Western blot analysis of Amph Ⅰ, Amph Ⅰ(1-278) and AEP in wild-type mouse brain during aging . Each row is an independent mouse.
Amph1 protein levels relative to GAPDH					Amph1 1-278 protein levels relative to GAPDH					AEP protein levels relative to GAPDH
8 months	10 months	14 months	16 months		8 months	10 months	14 months	16 months		8 months	10 months	14 months	16 months
0.578263	0.771979	1.02142	0.996716		0.097612	0.332644	1.16793	1.36688		0.741137	0.719541	0.879007	1.14988
0.782216	0.713102	0.924395	1.21081		0.09762	0.335182	1.14741	1.38671		0.741328	0.709329	0.889907	1.15216
1.13371	0.792893	1.03687	0.713288		0.097856	0.568116	0.888165	1.68353		0.658379	0.645305	0.775943	1.07957
0.850587	0.775625	1.04018	0.96146		0.097568	0.333762	1.16296	1.37443		0.664988	0.664055	0.84939	1.12939
