# Supplementary material for: Amphiphysin I cleavage by asparagine endopeptidase leads to tau hyperphosphorylation and synaptic dysfunction
Source: eLife. 2021 May 21;10:e65301. doi: 10.7554/eLife.65301 (PMC8139826; doi:10.7554/eLife.65301)
Supplement: Figure 2—figure supplement 2—source data 2. [file elife-65301-fig2-figsupp2-data2.xlsx]

## Sheet: Sheet1
Source data for Figure 2-supplementary 2, panel d. Western blot analysis of Amph Ⅰ and Amph Ⅰ(1-278) in tau P301S mouse brain during aging . Each row is an independent mouse.
Amph1 protein levels relative to GAPDH				Amph1 1-278 protein levels relative to GAPDH
4 month	6 month	10 month		4 month	6 month	10 month
0.868643	1.12557	1.1629		0.908447	0.931788	1.21011
0.810425	1.06884	1.12033		0.555982	0.786418	0.991869
0.941004	1.14826	1.21199		0.750681	0.981386	1.29843
1.3219	1.15352	0.870854		0.980821	0.961448	1.26415
