# Supplementary material for: Amphiphysin I cleavage by asparagine endopeptidase leads to tau hyperphosphorylation and synaptic dysfunction
Source: eLife. 2021 May 21;10:e65301. doi: 10.7554/eLife.65301 (PMC8139826; doi:10.7554/eLife.65301)
Supplement: Figure 2—figure supplement 2—source data 3. [file elife-65301-fig2-figsupp2-data3.xlsx]

## Sheet: Sheet1
Source data for Figure 2-supplementary 2, panel f. Western blot analysis of Amph Ⅰ and Amph Ⅰ (1-278) fragment in control and AD human brain samples. Each row is an independent patient.
Amph1 protein levels relative to GAPDH			Amph1 1-278 protein levels relative to GAPDH
CTR	AD		CTR	AD
0.682916	0.40319		0.021836	1.00711
0.274323	0.744815		0.084253	1.13209
0.58203	0.320701		0.03373	0.488233
0.681741	0.544373		0.038991	1.20305
0.619277	0.223666		0.0272	0.068966
