# Supplementary material for: Amphiphysin I cleavage by asparagine endopeptidase leads to tau hyperphosphorylation and synaptic dysfunction
Source: eLife. 2021 May 21;10:e65301. doi: 10.7554/eLife.65301 (PMC8139826; doi:10.7554/eLife.65301)
Supplement: Figure 2—source data 1. [file elife-65301-fig2-data1.xlsx]

## Sheet: Sheet1
Source data for Figure 2, panel d. Immunohistochemistry (IHC) of Amph Ⅰ N278 fragments in brain sections from subjects with AD and control subjects. Each row is an independent patient.
CTR	AD
1.0297	1.77425
1.04521	1.76138
1.23384	1.75384
1.22654	1.17753
