# Supplementary material for: Amphiphysin I cleavage by asparagine endopeptidase leads to tau hyperphosphorylation and synaptic dysfunction
Source: eLife. 2021 May 21;10:e65301. doi: 10.7554/eLife.65301 (PMC8139826; doi:10.7554/eLife.65301)
Supplement: Figure 2—source data 2. [file elife-65301-fig2-data2.xlsx]

## Sheet: Sheet1
Source data for Figure 2, panel f. Immunohistochemistry (IHC) of Amph Ⅰ N278 fragments in brain sections from 8-month-old tau P301S mice and wild-type mice. Each row is an independent mouse.
CORTEX				CA1
CTR	TAU P301S			CTR	TAU P301S
1.26155	1.61793			1.13326	1.99048
1.32825	1.44041			1.27031	1.69268
1.18982	1.78136			1.48544	2.01856
1.3718	1.48329			1.28418	2.02276
