# Supplementary material for: Amphiphysin I cleavage by asparagine endopeptidase leads to tau hyperphosphorylation and synaptic dysfunction
Source: eLife. 2021 May 21;10:e65301. doi: 10.7554/eLife.65301 (PMC8139826; doi:10.7554/eLife.65301)
Supplement: Figure 3—source data 1. [file elife-65301-fig3-data1.xlsx]

## Sheet: Sheet1
Source data for Figure 3, panel g. Quantification of the transferrin uptake in COS-7 cells transfected with EGFP, EGFP-Amph Ⅰ FL, EGFP-Amph Ⅰ (1-278), and EGFP-Amph Ⅰ (279-695) . Each row is an independent cell.
GFP-vector	GFP-AMPH1-FL	GFP-AMPH1-1-278	GFP-AMPH1-279-695
1.3279	1.07791	0.729255	0.703235
1.15913	1.2804	1.19167	0.530151
0.429196	1.28312	0.77925	0.484746
0.963522	1.15944	0.541144	1.22514
0.825915	0.798681	0.521714	0.720437
0.904184	0.830257	0.727822	1.00244
1.01607	1.03802	0.759007	0.605834
1.07593	1.0618	0.491865	0.591238
0.953971	1.41214	0.53101	0.577698
0.669421	1.32736	0.472984	0.804161
0.857624	0.917777	0.818797	0.766003
1.28574	0.857116	0.508237	0.478262
1.06592	1.16718	0.687261	0.250581
1.03044	0.946342	0.832643	0.584219
0.686714	1.08606	0.62278	0.339866
1.08262	0.991107	0.679995	0.266851
0.897833	0.794871	1.0111	0.574948
0.957997	0.885985	0.557212	0.748222
1.12515	0.962225	0.668616	0.483751
1.05587	0.904479	0.50887	0.312383
1.19736	0.730603	0.437536	0.298499
0.730952	0.910016	0.615459	0.944282
0.801014	0.808344	0.66697	0.461002
0.897364	0.892217	0.470528	0.768605
1.21787	0.635886	0.558804	1.11441
0.810392	0.887824	0.461337	1.06159
1.23532	1.3055	0.500845	1.40658
0.558698	1.38069	0.409689	0.930004
0.499702	1.26682	0.736589	0.883263
0.311225	1.25412	0.292468	1.0515
0.819738	1.03186	0.935089	0.73338
0.979338	1.00182	1.23668	1.09425
1.3455	0.902594	0.666137	1.26232
0.936323	0.928582	1.15812	0.817087
1.04413	1.08413	1.51789	0.833368
0.929622	0.889482	1.29217	0.85282
0.788348	0.95593	1.19653	0.719333
0.69766	1.47437	1.43009	1.02423
1.24091	0.903391	0.70716	0.842749
1.17502	1.19405	0.723026	0.988886
0.572367	2.59081	1.40356	0.806145
1.1122	2.4513	0.815461	0.937513
1.18399	1.43093	0.933848	0.804371
1.37663	1.74483	0.568836	0.682565
0.945701	0.979478	0.827466	0.827765
1.5279	1.33988	1.05432	1.22722
0.94501	1.07945	0.994877	1.01369
1.07496	1.06658	0.745398	0.510782
1.61942	1.08906	0.889873	0.627002
2.10474	1.03564	1.83251	0.817645
1.98154	1.21418	1.36471	0.985962
1.39914	0.99953	1.38667	1.065
1.1546	0.852668	1.12603	0.588771
0.958305	0.91108	0.721823	0.928953
0.867019	1.342	0.769066	0.645912
0.61873	1.24649	0.65564	0.951395
0.901605	0.888228	0.935622	1.19806
0.876891	1.01248	0.803134	1.06488
0.754497	0.735606	1.0557	1.30219
0.769987	1.39756	0.92208	1.06643
1.07367	1.14367	0.95444	0.988929
1.08935	1.27151	0.906129	1.14154
0.91741	1.04888	0.88606	1.29959
0.927662	1.33568	0.781876	1.30871
1.20579	0.95475	1.05021	1.03858
1.15844	0.983229	0.856049	0.715721
0.636995	1.14935	0.770835	0.684034
0.656495		0.777514	0.876229
0.837648		0.964748	0.831662
0.981278			0.956052
0.694857			1.38033
1.07341			1.50062
0.928165			1.41563
1.31514			1.21404
1.23479
1.06022
0.938855
1.07156
0.940299
0.691233
1.2827
0.943051
1.01536
