# Supplementary material for: Amphiphysin I cleavage by asparagine endopeptidase leads to tau hyperphosphorylation and synaptic dysfunction
Source: eLife. 2021 May 21;10:e65301. doi: 10.7554/eLife.65301 (PMC8139826; doi:10.7554/eLife.65301)
Supplement: Figure 3—source data 3. [file elife-65301-fig3-data3.xlsx]

## Sheet: Sheet1
Source data for Figure 3, panel i. Quantitative analysis of FM 4-64 uptake. Each row is an independent bouton.
Vector	Amph1 FL	Amph1 1-278	Amph1 279-695
0.40961	1.60665	1.13636	0.217061
0.385789	1.70161	0.003445	0.177358
0.289042	1.48139	0.217731	0.154743
1.18745	0.65289	0.0094	0.150446
0.884019	0.496121	0.258589	0.214966
0.411477	0.034384	0.06351	0.063858
0.232981	0.436348	0.011605	0.218279
0.276826	0.780187	0.523107	0.148019
0.228608	0.783056	0.170776	0.237143
0.407396	0.899307	0.07538	0.135444
0.526401	0.368403	0.608291	0.216176
0.245829	1.35736	0.062815	0.262179
0.272345	0.822362	0.000826	0.110075
0.167347	2.01517	0.157113	0.068604
0.187041	1.75931	0.000966	0.046876
0.165382	1.3991	0.26811	0.069598
0.167999	0.782652	0.318083	0.086473
0.407535	0.583706	0.002212	0.084822
0.485638	0.971351	0	0
0.984385	1.30537	0.20129	0.068385
0.565031	1.3721	0.250857	0.083054
0.305161	1.43513	0.0809	0.100922
0.570938	0.645118	0.198251	0
1.13732	0.595987	0.074	0.113825
0.485638	0.544829	0.002764	0.120334
1.95499	1.28368	0.050532	0.018199
0.635253	0.657389	0.518543	0.084712
1.06314	0.578808	0.113762	0.066839
0.712033	1.07614	0.023466	0.126403
0.404252	1.56816	0.14938	0.166769
0.529599	0.491207	0.014637	0.092868
0.561101	0.49898	0.091669	0
0.756664	0	0.870859	0.09265
1.12694	0	1.25086	1.40585
0.811575	0.717971	0.835584	0.071796
1.13491	0.054037	2.78359	0.029569
1.29816	0.170274	0.743524	0.21961
1.54946	0.211221	1.1441	0.13941
2.15733	0.485052	2.99635	0.141402
2.98365	0.134669	2.27355	0.168766
2.7831	0.835599	1.21922	1.77221
1.47818	1.51969	1.17013	1.22401
1.06866	1.20152	0.810715	0.882368
1.07807	1.45349	0.810995	0.220008
1.37945	1.24448	1.23275	0.356008
0.91602	0.813213	0.615583	0.674745
0.78834	0.677728	1.05479	2.61649
0.91211	0.822869	0.8661	0.714587
1.28086	0.614294	1.11512	0.500772
0.611783	0.882103	0.929977	0.29864
2.62813	1.11081	0.476164	0.138922
2.1635	0.965671	0.517271	0.684443
1.22958	0.867251		0.63946
1.82031	0.721201		0.132963
	2.34957		0.192901
	0.892191		0.847784
	0.967749
	1.05067
	1.6883
	1.8948
	2.88013
	1.75104
	1.56836
	1.31601
	1.04119
	0.927567
	0.995158
	0.735706
	0.426113
	0.767835
