# Supplementary material for: Amphiphysin I cleavage by asparagine endopeptidase leads to tau hyperphosphorylation and synaptic dysfunction
Source: eLife. 2021 May 21;10:e65301. doi: 10.7554/eLife.65301 (PMC8139826; doi:10.7554/eLife.65301)
Supplement: Figure 3—source data 4. [file elife-65301-fig3-data4.xlsx]

## Sheet: Sheet1
Source data for Figure 3, panel j. Quantification of the dendritic spines density was calculated as the number of dendritic branch per 100 μm dendrite. Each row is an independent experiment.
Vector	Amph1 FL	Amph1 1-278	Amph1 279-695
26.8182	23.7318	15.4392	23.8987
21.8969	26.0294	16.8571	25.5541
27.2711	26.2222	23.2676	31.6778
21.4546	34.9112	21.8518	16.3564
27.3263	29.0462	12.7255	17.5405
