# Supplementary material for: Amphiphysin I cleavage by asparagine endopeptidase leads to tau hyperphosphorylation and synaptic dysfunction
Source: eLife. 2021 May 21;10:e65301. doi: 10.7554/eLife.65301 (PMC8139826; doi:10.7554/eLife.65301)
Supplement: Figure 4—source data 1. [file elife-65301-fig4-data1.xlsx]

## Sheet: Sheet1
Source data for Figure 4, panel b. Cumulative plots and mean values of mEAC amplitude in isolated hippocampal neurons expressing full-length Amph Ⅰ or its fragments. Each column is an independent experiment.
	Amplitude (pA)	Vector					Full length					1-278					279-695
		A:Y1	A:Y2	A:Y3	A:Y4	A:Y5	B:Y1	B:Y2	B:Y3	B:Y4	B:Y5	C:Y1	C:Y2	C:Y3	C:Y4	C:Y5	D:Y1	D:Y2	D:Y3	D:Y4	D:Y5
	0	0	0	0	0	0	0	0	0	0		0	0	0	0	0	0	0	0	0	0
	0.5	0	0	0	0	0	0	0	0	0	0	0	0	0	0	0	0	0	0	0	0
	1	0	0	0	0	0	0	0	0	0	0	0	0	0	0	0	0	0	0	0	0
	1.5	0	0	0	0	0	0	0	0	0	0	0	0	0	0	0	0	0	0	0	0
	2	0	0	0	0	0	0	0	0	0	0	0	0	0	0	0	0	0	0	0	0
	2.5	0	0	0	0	0	0	0	0	0	0	0	0	0	0	0	0	0	0	0	0
	3	0	0	0	0	0	0	0	0	0	0	0	0	0	0	0	0	0	0	0	0
	3.5	0	0	0	0	0	0	0	0	0	0	0	0	0	0	0	0	0	0	0	0
	4	0	0	0	0	0	0	0	0	0	0	0	0	0	0	0	0	0	0	0	0
	4.5	0	0	0	0	0	0	0	0	0	0	0	0	0	0	0	0	0	0	0	0
	5	0	0	0	0	0	0	0	0	0	0	0.0602157	0	0	0	0	0	0	0	0	0
	5.5	0	0	0	0	0	0	0	0.0107492	0.0108844	0	0.138879	0	0.0596185	0	0	0	0	0	0	0
	6	0	0	0	0	0	0	0.0163229	0.0699696	0.0708497	0	0.208319	0	0.137926	0	0.0284656	0	0	0	0	0
	6.5	0.0156262	0	0.0380205	0	0.0421012	0	0.114215	0.11298	0.114401	0	0.277758	0	0.227391	0.0271717	0.0852972	0	0	0	0	0.0404092
	7	0.121474	0	0.113966	0.0155922	0.104507	0.0288637	0.17981	0.16678	0.168878	0	0.32868	0	0.298217	0.0893779	0.162092	0	0	0	0	0.124872
	7.5	0.219436	0	0.178546	0.0493669	0.183986	0.0941395	0.245075	0.22058	0.223354	0.0487697	0.407379	0	0.372771	0.143852	0.213279	0	0.0338402	0	0.0287642	0.179962
	8	0.286051	0	0.26592	0.0909704	0.239404	0.19992	0.277708	0.2959	0.299622	0.0748101	0.46756	0	0.443598	0.194394	0.270153	0	0.0710644	0	0.106933	0.23138
	8.5	0.364421	0	0.311506	0.148126	0.301472	0.267235	0.35929	0.33356	0.337755	0.126852	0.53237	0.0393144	0.480875	0.244937	0.327027	0	0.121873	0.0450871	0.1604	0.275452
	9	0.395769	0	0.349495	0.197501	0.365756	0.353783	0.375606	0.39812	0.403128	0.191904	0.569404	0.104769	0.518152	0.322695	0.361152	0	0.176039	0.103073	0.213866	0.319524
	9.5	0.446709	0	0.372288	0.249475	0.412307	0.397057	0.391923	0.41964	0.424918	0.217925	0.624956	0.170249	0.536791	0.34991	0.412339	0.0692729	0.216664	0.138505	0.254994	0.359924
	10	0.493731	0.0456843	0.410276	0.306646	0.472158	0.454755	0.408239	0.46268	0.4685	0.269967	0.648102	0.235729	0.566613	0.381013	0.452151	0.163784	0.236976	0.170715	0.300235	0.400324
	10.5	0.536835	0.12643	0.46346	0.361219	0.529792	0.541303	0.424556	0.51648	0.522976	0.315504	0.671249	0.270652	0.60389	0.435444	0.489119	0.277172	0.287757	0.24802	0.353702	0.448069
	11	0.572102	0.22327	0.501449	0.413192	0.556393	0.584577	0.457188	0.54876	0.555662	0.377303	0.699025	0.314305	0.622529	0.458771	0.500494	0.342266	0.348693	0.305998	0.382491	0.484796
	11.5	0.607368	0.27976	0.528041	0.45737	0.596293	0.618235	0.506138	0.55414	0.56111	0.416335	0.703654	0.366689	0.65235	0.485986	0.540306	0.405259	0.375777	0.399408	0.427732	0.510504
	12	0.638716	0.33087	0.554633	0.491153	0.645061	0.642276	0.53877	0.57028	0.577453	0.468376	0.749947	0.397247	0.697083	0.528753	0.560212	0.489251	0.406245	0.502482	0.464748	0.528868
	12.5	0.670064	0.40888	0.577426	0.519739	0.682745	0.680741	0.555087	0.58642	0.593796	0.487892	0.773093	0.427804	0.723177	0.55208	0.582961	0.548045	0.440099	0.59267	0.493537	0.547231
	13	0.701412	0.48151	0.59642	0.558719	0.711562	0.709591	0.555087	0.5918	0.599244	0.517166	0.777723	0.453996	0.730632	0.583184	0.614242	0.59214	0.507806	0.640986	0.518214	0.558249
	13.5	0.724923	0.53262	0.615414	0.584706	0.740379	0.728824	0.571403	0.63484	0.642825	0.556197	0.800869	0.493285	0.752999	0.602623	0.622773	0.625737	0.548431	0.65387	0.542891	0.576613
	14	0.728842	0.55952	0.645805	0.613292	0.762546	0.748056	0.620352	0.64022	0.648273	0.595228	0.819387	0.506381	0.775365	0.629838	0.631305	0.657234	0.565357	0.663533	0.588132	0.591304
	14.5	0.748434	0.58373	0.657202	0.641877	0.78028	0.772097	0.636669	0.66712	0.675511	0.631007	0.833274	0.528208	0.790276	0.64539	0.636992	0.69293	0.589055	0.692523	0.616922	0.609667
	15	0.783701	0.63215	0.6648	0.660068	0.804663	0.79133	0.652985	0.68864	0.697302	0.657028	0.847162	0.550034	0.808914	0.660941	0.642679	0.711828	0.619524	0.702186	0.65805	0.635376
	15.5	0.799375	0.65098	0.672397	0.680858	0.817964	0.810563	0.701934	0.71016	0.719092	0.673291	0.86568	0.589322	0.842464	0.680381	0.648367	0.743325	0.643221	0.711849	0.662162	0.650067
	16	0.815049	0.67788	0.683794	0.709444	0.837914	0.824988	0.734567	0.73168	0.740883	0.679796	0.879567	0.606784	0.857375	0.695932	0.662585	0.776922	0.67369	0.734396	0.690952	0.664758
	16.5	0.826804	0.69402	0.706587	0.732832	0.853431	0.834604	0.734567	0.7532	0.762674	0.692807	0.893455	0.615514	0.868558	0.711484	0.671117	0.80002	0.704158	0.74728	0.711516	0.686794
	17	0.834641	0.71554	0.714185	0.764016	0.864514	0.844221	0.750884	0.79086	0.800807	0.712323	0.907343	0.637341	0.890924	0.723148	0.679648	0.823117	0.717699	0.756943	0.727967	0.705157
	17.5	0.846397	0.72899	0.725581	0.797799	0.873381	0.844221	0.750884	0.807	0.81715	0.728586	0.921231	0.650437	0.898379	0.727036	0.688179	0.850415	0.741397	0.763386	0.744419	0.719848
	18	0.854234	0.74244	0.744576	0.821187	0.884465	0.858645	0.783516	0.81238	0.822598	0.757859	0.921231	0.663533	0.898379	0.742587	0.699554	0.869313	0.761709	0.77627	0.752644	0.730866
	18.5	0.862071	0.77472	0.752173	0.85497	0.891115	0.877878	0.799833	0.81238	0.822598	0.777375	0.92586	0.68536	0.920746	0.758139	0.713772	0.888211	0.778636	0.802038	0.76087	0.752902
	19	0.865989	0.79624	0.767369	0.880957	0.911065	0.882686	0.816149	0.83928	0.849836	0.787133	0.93049	0.702821	0.928201	0.769802	0.727991	0.89871	0.802334	0.814922	0.773208	0.789629
	19.5	0.869908	0.80969	0.774967	0.886155	0.915499	0.897111	0.832465	0.85004	0.860732	0.79689	0.939748	0.733379	0.939384	0.781466	0.733678	0.909209	0.809105	0.831027	0.781434	0.807993
	20	0.877745	0.82852	0.778765	0.899148	0.915499	0.906727	0.848782	0.86618	0.877075	0.806648	0.939748	0.777033	0.950567	0.797018	0.747897	0.919708	0.81249	0.843911	0.806111	0.84472
	20.5	0.885582	0.85273	0.782564	0.906944	0.919932	0.911536	0.865098	0.87156	0.882522	0.809901	0.944378	0.798859	0.96175	0.808681	0.759272	0.923907	0.81926	0.850353	0.826675	0.863083
	21	0.901256	0.86887	0.786363	0.925135	0.931016	0.916344	0.881415	0.88232	0.893418	0.819659	0.949007	0.811955	0.965478	0.824233	0.770647	0.938606	0.826031	0.850353	0.839013	0.881447
	21.5	0.909093	0.87963	0.790162	0.927734	0.937666	0.916344	0.881415	0.8877	0.898865	0.842427	0.958266	0.829417	0.965478	0.839784	0.779178	0.944905	0.832802	0.856796	0.855464	0.89981
	22	0.913011	0.88501	0.801558	0.93553	0.937666	0.916344	0.881415	0.90384	0.915208	0.852185	0.958266	0.833782	0.976661	0.851448	0.790553	0.953304	0.842958	0.863237	0.859577	0.910828
	22.5	0.920848	0.89577	0.816754	0.940727	0.942099	0.916344	0.897731	0.90922	0.920656	0.861943	0.958266	0.855609	0.980389	0.851448	0.790553	0.959604	0.86327	0.86968	0.86369	0.918173
	23	0.924767	0.91191	0.831949	0.943326	0.944316	0.921152	0.914047	0.91998	0.931551	0.868448	0.958266	0.86434	0.980389	0.855336	0.793396	0.961703	0.870041	0.872901	0.89248	0.929191
	23.5	0.924767	0.91998	0.850943	0.945925	0.948749	0.921152	0.914047	0.92536	0.936999	0.881459	0.962895	0.886166	0.987845	0.870888	0.79624	0.963803	0.873426	0.879343	0.908931	0.947555
	24	0.932604	0.92536	0.866139	0.945925	0.950966	0.92596	0.930364	0.9415	0.953342	0.894469	0.962895	0.899262	0.987845	0.874775	0.799084	0.968003	0.886968	0.889006	0.917157	0.947555
	24.5	0.936523	0.92536	0.877536	0.945925	0.953183	0.930768	0.94668	0.95226	0.964238	0.900974	0.967524	0.899262	0.987845	0.874775	0.807615	0.970102	0.897124	0.905111	0.921269	0.951228
	25	0.936523	0.92536	0.888932	0.945925	0.957616	0.930768	0.94668	0.96302	0.975133	0.910732	0.967524	0.903628	0.987845	0.886439	0.813302	0.976402	0.90728	0.911553	0.937721	0.9549
	25.5	0.940441	0.92805	0.904127	0.948523	0.959833	0.930768	0.94668	0.96302	0.975133	0.92049	0.967524	0.912358	0.987845	0.898103	0.816146	0.976402	0.914051	0.921216	0.937721	0.958573
	26	0.956115	0.93074	0.907926	0.948523	0.959833	0.930768	0.94668	0.96302	0.975133	0.930248	0.972154	0.916724	0.987845	0.905879	0.821833	0.976402	0.927593	0.927658	0.945946	0.958573
	26.5	0.960033	0.93343	0.919323	0.951122	0.962049	0.930768	0.94668	0.96302	0.975133	0.943258	0.972154	0.925454	0.987845	0.92143	0.827521	0.980602	0.934363	0.9341	0.954172	0.958573
	27	0.963952	0.94419	0.923122	0.953721	0.962049	0.930768	0.94668	0.9684	0.980581	0.956269	0.972154	0.925454	0.987845	0.925318	0.830365	0.980602	0.947905	0.937321	0.954172	0.962246
	27.5	0.963952	0.94419	0.926921	0.953721	0.962049	0.930768	0.94668	0.9684	0.980581	0.959521	0.981412	0.92982	0.987845	0.929206	0.833208	0.982701	0.954676	0.937321	0.954172	0.965919
	28	0.963952	0.94688	0.93072	0.953721	0.962049	0.930768	0.94668	0.9684	0.980581	0.959521	0.981412	0.942916	0.991572	0.933094	0.844583	0.982701	0.954676	0.937321	0.954172	0.965919
	28.5	0.963952	0.94957	0.938317	0.958918	0.964266	0.945193	0.94668	0.9684	0.980581	0.962774	0.981412	0.951646	0.991572	0.944758	0.847427	0.982701	0.961446	0.943763	0.962398	0.965919
	29	0.96787	0.95495	0.938317	0.961517	0.9687	0.950001	0.94668	0.97378	0.986028	0.966026	0.981412	0.956012	0.991572	0.948645	0.858802	0.984801	0.964832	0.943763	0.970623	0.965919
	29.5	0.971789	0.96033	0.945915	0.966714	0.973133	0.959618	0.94668	0.97378	0.986028	0.966026	0.986041	0.960377	0.991572	0.948645	0.864489	0.984801	0.964832	0.946985	0.970623	0.969591
	30	0.971789	0.96033	0.953513	0.966714	0.97535	0.959618	0.94668	0.97378	0.986028	0.972532	0.986041	0.964742	0.991572	0.948645	0.864489	0.986901	0.968217	0.953426	0.974736	0.973264
	30.5	0.971789	0.96033	0.964909	0.966714	0.979783	0.959618	0.94668	0.97378	0.986028	0.975784	0.990671	0.969108	0.991572	0.952533	0.875864	0.986901	0.968217	0.953426	0.978849	0.980609
	31	0.975707	0.96033	0.968708	0.966714	0.979783	0.959618	0.94668	0.97378	0.986028	0.975784	0.990671	0.969108	0.991572	0.956421	0.878708	0.986901	0.971602	0.956648	0.978849	0.980609
	31.5	0.979626	0.96033	0.968708	0.966714	0.979783	0.959618	0.94668	0.97916	0.991476	0.975784	0.990671	0.973473	0.991572	0.960309	0.881551	0.986901	0.978373	0.956648	0.982962	0.980609
	32	0.979626	0.96033	0.968708	0.971912	0.982	0.959618	0.94668	0.97916	0.991476	0.979037	0.990671	0.977839	0.991572	0.960309	0.892926	0.986901	0.978373	0.956648	0.982962	0.980609
	32.5	0.979626	0.96033	0.976306	0.97451	0.986433	0.959618	0.94668	0.98454	1	0.98229	0.990671	0.977839	0.991572	0.960309	0.898614	0.9911	0.978373	0.959869	0.982962	0.987955
	33	0.983545	0.9684	0.976306	0.97451	0.986433	0.959618	0.94668	0.98454		0.98229	0.990671	0.982204	0.991572	0.960309	0.901457	0.9911	0.978373	0.96309	0.982962	0.987955
	33.5	0.983545	0.9684	0.976306	0.97451	0.986433	0.959618	0.94668	0.98454		0.98229	0.990671	0.990935	0.991572	0.964197	0.912832	0.9911	0.978373	0.969532	0.987074	0.987955
	34	0.987463	0.97647	0.976306	0.977109	0.986433	0.959618	0.94668	0.98454		0.98229	0.990671	0.990935	0.991572	0.971973	0.91852	0.9932	0.981759	0.972753	0.987074	0.991627
	34.5	0.987463	0.97916	0.980105	0.977109	0.986433	0.959618	1	0.98454		0.98229	0.990671	0.990935	0.991572	0.979748	0.91852	0.9932	0.981759	0.972753	0.987074	0.991627
	35	0.987463	0.97916	0.983903	0.977109	0.986433	0.959618		0.98454		0.98229	0.990671	0.990935	0.991572	0.979748	0.929895	0.9932	0.981759	0.975974	0.991187	0.991627
	35.5	0.987463	0.98454	0.983903	0.977109	0.986433	0.959618		0.98454		0.98229	0.990671	0.990935	0.991572	0.987524	0.929895	0.9932	0.985144	0.975974	0.991187	0.991627
	36	0.987463	0.98454	0.983903	0.979708	0.986433	0.959618		0.98454		0.98229	0.990671	0.990935	0.991572	0.987524	0.929895	0.9932	0.985144	0.985637	0.991187	0.991627
	36.5	0.987463	0.98454	0.987702	0.979708	0.986433	0.959618		0.98454		0.98229	0.990671	0.990935	0.991572	0.991412	0.938426	0.9932	0.988529	0.985637	0.991187	0.991627
	37	0.987463	0.98723	0.987702	0.979708	0.98865	0.959618		0.98454		0.985542	0.990671	0.990935	0.991572	0.991412	0.941269	0.9932	0.988529	0.988858	0.991187	0.991627
	37.5	0.987463	0.98723	0.987702	0.979708	0.98865	0.959618		0.98454		0.985542	0.990671	0.990935	0.991572	0.991412	0.941269	0.9932	0.991915	0.988858	0.991187	1
	38	0.987463	0.98992	0.987702	0.979708	0.98865	1		0.98454		0.985542	0.990671	1	0.991572	0.991412	0.941269	0.9932	0.991915	0.988858	0.991187
	38.5	0.987463	0.98992	0.987702	0.979708	0.98865			0.98454		0.988795	0.990671		0.991572	0.991412	0.941269	0.9932	0.991915	0.988858	0.991187
	39	0.987463	0.98992	0.991501	0.979708	0.98865			0.98454		0.988795	0.990671		0.991572	0.991412	0.941269	0.9932	0.991915	0.988858	0.991187
	39.5	0.987463	0.99261	0.996351	0.982307	0.98865			0.98454		0.988795	0.990671		0.991572	0.991412	0.944113	0.9932	1	0.988858	0.991187
	40	0.987463	0.994822	0.997231	0.982307	0.98865			0.98454		0.988795	0.990671		0.991572	0.991412	0.944113	0.9932		0.988858	0.991187
	40.5	0.987463	1	1	0.982307	0.98865			0.98454		0.988795	0.990671		0.991572	0.991412	0.949801	0.9932		0.988858	0.991187
	41	0.987463			0.982307	0.98865			0.98454		0.988795	0.990671		0.991572	0.991412	0.949801	0.9932		0.988858	0.991187
	41.5	0.987463			0.982307	0.993083			0.98454		0.988795	0.990671		0.991572	0.991412	0.949801	0.9932		0.988858	1
	42	0.987463			0.982307	0.993083			0.98454		0.988795	0.990671		0.991572	0.991412	0.958332	0.9932		0.988858
	42.5	0.987463			0.982307	0.993083			0.98454		0.988795	0.990671		0.991572	0.991412	0.961175	0.9932		0.988858
	43	0.987463			0.982307	0.993083			0.98454		0.988795	0.990671		0.991572	0.991412	0.966863	0.9932		0.988858
	43.5	0.987463			0.984905	0.993083			0.98454		0.988795	0.990671		0.991572	0.991412	0.966863	0.9932		0.988858
	44	0.987463			0.987504	0.993083			0.98454		0.988795	0.990671		0.991572	0.991412	0.966863	0.9932		0.988858
	44.5	0.987463			0.987504	0.993083			0.98454		0.992047	0.990671		0.991572	0.991412	0.975394	0.9932		0.988858
	45	0.991382			0.990103	0.993083			0.98454		0.992047	0.990671		0.991572	0.991412	0.975394	0.9932		0.988858
	45.5	0.991382			0.990103	0.993083			0.98454		0.992047	0.990671		0.991572	1	0.975394	0.9932		0.988858
	46	0.991382			0.990103	0.993083			1		0.992047	0.990671		0.991572		0.981081	0.9932		0.988858
	46.5	0.991382			0.990103	0.993083					0.992047	0.990671		0.991572		0.981081	0.9932		0.988858
	47	0.991382			0.990103	0.993083					0.992047	0.990671		0.991572		0.981081	0.9932		0.988858
	47.5	0.991382			0.990103	0.993083					0.992047	0.990671		0.991572		0.981081	0.9932		0.988858
	48	0.991382			0.990103	0.993083					0.992047	0.990671		0.991572		0.981081	0.9932		0.988858
	48.5	0.991382			0.990103	0.993083					0.992047	0.990671		0.991572		0.981081	0.9932		0.992079
	49	0.991382			0.990103	0.993083					0.992047	0.990671		0.991572		0.981081	0.9932		0.992079
	49.5	0.991382			0.990103	0.993083					0.992047	0.990671		0.991572		0.981081	1		0.992079
	50	0.991382			0.990103	0.993083					0.992047	0.990671		0.991572		0.981081			0.992079
	50.5	0.991382			0.990103	0.993083					0.992047	0.990671		0.991572		0.983925			0.992079
	51	0.991382			0.990103	0.993083					0.992047	0.990671		0.991572		0.986769			0.992079
	51.5	0.991382			0.990103	0.993083					0.993071	0.991074		0.995321		0.989613			0.992079
	52	0.991382			0.990103	0.993083					0.994821	0.992184		1		0.989613			0.992079
	52.5	0.991382			0.990103	0.993083					0.995632	1				0.989613			0.992079
	53	0.996321			0.990103	0.993083					1					0.989613			0.992079
	53.5	1			0.992701	0.993083										0.992456			0.992079
	54				0.992701	0.993083										0.992456			0.992079
	54.5				0.992701	0.993083										0.992456			0.992079
	55				0.992701	0.993083										0.992456			0.992079
	55.5				0.992701	0.993083										0.992456			0.992079
	56				0.992701	0.993083										0.992456			0.992079
Amph1-amplitude
	Vector					Full length					1-278					279-695
	A:Y1	A:Y2	A:Y3	A:Y4	A:Y5	B:Y1	B:Y2	B:Y3	B:Y4	B:Y5	C:Y1	C:Y2	C:Y3	C:Y4	C:Y5	D:Y1	D:Y2	D:Y3	D:Y4	D:Y5
Amplitude (pA)	16.98	9.39	13.37	8.54	14.81	9.75	13.82	10.93	15.44	12.01	11.65	8.16	11.91	11.2	11.02	7.86	13.82	10.93	15.44	11.69
