# Supplementary material for: Amphiphysin I cleavage by asparagine endopeptidase leads to tau hyperphosphorylation and synaptic dysfunction
Source: eLife. 2021 May 21;10:e65301. doi: 10.7554/eLife.65301 (PMC8139826; doi:10.7554/eLife.65301)
Supplement: Figure 4—source data 2. [file elife-65301-fig4-data2.xlsx]

## Sheet: Sheet1
Source data for Figure 4, panel c. Cumulative plots and mean values of mEAC frequency in isolated hippocampal neurons expressing full-length Amph Ⅰ or its fragments. Each column is an independent experiment.
	Inter-event interval (s)	Vector					Full Length					1-278					279-695
		A:Y1	A:Y2	A:Y3	A:Y4	A:Y5	B:Y1	B:Y2	B:Y3	B:Y4	B:Y5	C:Y1	C:Y2	C:Y3	C:Y4	C:Y5	D:Y1	D:Y2	D:Y3	D:Y4	D:Y5
	0	0	0	0	0	0	0	0	0	0	0	0	0	0	0	0	0	0	0	0	0
	0.05	0.136434	0.128448	0.109594	0.124089	0.242309	0.184857	0.18726	0.182665	0.185147	0.107328	0.102043	0.141446	0.0291096	0.100691	0.0852837	0.0862389	0.157959	0.124967	0.102301	0.309414
	0.1	0.24948	0.297037	0.204071	0.276614	0.430307	0.35452	0.359129	0.350316	0.355076	0.196435	0.191848	0.181859	0.0970321	0.151036	0.139465	0.141027	0.268485	0.253138	0.197294	0.46412
	0.15	0.304054	0.409429	0.317444	0.416214	0.551461	0.46594	0.471998	0.460415	0.466671	0.291234	0.293103	0.262686	0.145606	0.184599	0.204146	0.206432	0.337563	0.362084	0.266712	0.533738
	0.2	0.37422	0.551258	0.400584	0.511865	0.647549	0.546974	0.554084	0.540488	0.547831	0.373639	0.379853	0.282892	0.184435	0.234945	0.233664	0.236281	0.402036	0.432578	0.339784	0.580151
	0.25	0.448284	0.63689	0.476166	0.586836	0.710215	0.630539	0.638736	0.623062	0.631528	0.452134	0.448722	0.292996	0.223263	0.302071	0.258129	0.26102	0.489536	0.51589	0.409202	0.63043
	0.3	0.510654	0.695762	0.54419	0.685072	0.770792	0.67612	0.68491	0.668103	0.67718	0.514314	0.516008	0.343512	0.242677	0.402762	0.293095	0.296377	0.544798	0.567158	0.500542	0.684578
	0.35	0.553534	0.717171	0.608435	0.760042	0.81257	0.729298	0.738779	0.72065	0.730442	0.563959	0.580639	0.404132	0.310627	0.453107	0.35738	0.361382	0.595456	0.624835	0.595535	0.711651
	0.4	0.639292	0.757311	0.650005	0.79365	0.852258	0.777412	0.787518	0.768193	0.778631	0.608848	0.629973	0.434442	0.36887	0.503453	0.401656	0.406154	0.650718	0.666491	0.635725	0.73099
	0.45	0.666579	0.794775	0.687796	0.824672	0.873147	0.817928	0.828561	0.808229	0.819211	0.655942	0.679097	0.454649	0.407698	0.520234	0.431173	0.436002	0.669139	0.724168	0.705143	0.754196
	0.5	0.713357	0.834915	0.718028	0.847939	0.894035	0.843251	0.854213	0.833252	0.844573	0.688953	0.714911	0.474855	0.436819	0.520234	0.455837	0.460942	0.696771	0.775436	0.75264	0.765799
	0.55	0.752338	0.858999	0.744482	0.87379	0.906569	0.868574	0.879865	0.858275	0.869936	0.722049	0.75099	0.505165	0.475648	0.587361	0.490406	0.495899	0.729007	0.810684	0.785522	0.79674
	0.6	0.779625	0.885759	0.789831	0.899642	0.917013	0.883768	0.895257	0.873288	0.885153	0.75195	0.778663	0.515268	0.495062	0.620925	0.505165	0.510823	0.761244	0.829909	0.807444	0.79674
	0.65	0.806912	0.917871	0.808727	0.912568	0.92328	0.904026	0.915778	0.893306	0.905443	0.780978	0.801781	0.515268	0.53389	0.620925	0.524579	0.530455	0.788875	0.839522	0.836673	0.808343
	0.7	0.818606	0.936603	0.854076	0.922909	0.933724	0.919219	0.931169	0.90832	0.920661	0.809542	0.818627	0.535475	0.553304	0.637707	0.54439	0.550487	0.802691	0.855544	0.865901	0.827681
	0.75	0.834198	0.944631	0.876751	0.93842	0.937902	0.931881	0.943995	0.920831	0.933342	0.834739	0.832905	0.555682	0.572719	0.654488	0.5642	0.570519	0.816506	0.871565	0.876862	0.839284
	0.8	0.849791	0.955335	0.891867	0.941005	0.937902	0.949607	0.961952	0.938347	0.951096	0.852432	0.852924	0.565785	0.621254	0.688052	0.593519	0.600167	0.834927	0.881178	0.89513	0.839284
	0.85	0.869282	0.963363	0.899425	0.959101	0.946257	0.949607	0.961952	0.938347	0.951096	0.868965	0.870504	0.565785	0.640668	0.704834	0.603226	0.609983	0.844138	0.961285	0.917052	0.84702
	0.9	0.888772	0.966039	0.9221	0.969442	0.952524	0.954672	0.967082	0.943351	0.956169	0.881212	0.878297	0.575888	0.650375	0.721615	0.613132	0.619999	0.853348	0.974102	0.920705	0.866358
	0.95	0.904365	0.968715	0.929658	0.972027	0.956701	0.957204	0.969647	0.945854	0.958705	0.889078	0.893395	0.575888	0.669789	0.721615	0.622839	0.629815	0.857954	0.974102	0.931666	0.870226
	1	0.916059	0.968715	0.933437	0.972027	0.969235	0.964801	0.977343	0.95336	0.966314	0.898519	0.908081	0.606198	0.669789	0.738397	0.637994	0.645139	0.88098	0.977306	0.942627	0.881829
	1.05	0.923855	0.974067	0.952332	0.979783	0.975501	0.969865	0.982473	0.958365	0.971386	0.90644	0.915651	0.636508	0.679496	0.738397	0.658002	0.665372	0.885585	0.977306	0.949934	0.885696
	1.1	0.927753	0.976743	0.956112	0.979783	0.975501	0.97493	0.987604	0.963369	0.976459	0.914582	0.923378	0.646611	0.689204	0.755179	0.667907	0.675388	0.894795	0.977306	0.949934	0.897299
	1.15	0.931652	0.979419	0.959891	0.984953	0.981768	0.979994	1	0.968374	0.981531	0.921395	0.929732	0.656714	0.698911	0.771961	0.677813	0.685404	0.913216	0.977306	0.953588	0.901167
	1.2	0.951142	0.979419	0.959891	0.987538	0.985946	0.982527		0.970876	0.984067	0.915115	0.93476	0.697128	0.698911	0.771961	0.698019	0.705837	0.922427	0.98051	0.957241	0.905035
	1.25	0.951142	0.979419	0.959891	0.987538	0.985946	0.985059		0.973378	0.986604	0.925318	0.939878	0.707231	0.708618	0.788742	0.707924	0.715853	0.931637	0.98051	0.964548	0.908902
	1.3	0.95504	0.979419	0.96367	0.987538	0.985946	0.985059		0.973378	0.986604	0.929639	0.946124	0.717334	0.718325	0.788742	0.71783	0.725869	0.931637	0.98051	0.971855	0.920505
	1.35	0.966735	0.979419	0.971228	0.987538	0.988035	0.985059		0.978383	0.986604	0.935213	0.947488	0.727438	0.737739	0.788742	0.732588	0.740793	0.936242	0.983715	0.975509	0.924373
	1.4	0.970633	0.979419	0.971228	0.987538	0.988035	0.985059		0.978383	0.986604	0.942178	0.951094	0.737541	0.737739	0.822306	0.73764	0.745902	0.936242	0.983715	0.979163	0.932109
	1.45	0.970633	0.979419	0.971228	1	0.988035	0.985059		0.978383	0.986604	0.935641	0.95466	0.747644	0.747446	0.839088	0.747545	0.755918	0.936242	0.983715	0.982816	0.932109
	1.5	0.970633	0.982095	0.971228		0.988035	0.985059		0.978383	0.986604	0.939699	0.956107	0.757748	0.757153	0.872651	0.75745	0.765934	0.936242	0.986919	0.982816	0.939844
	1.55	0.970633	0.984771	0.971228		0.988035	0.985059		0.978383	0.986604	0.948058	0.95792	0.777954	0.757153	0.872651	0.767554	0.77615	0.950058	0.986919	0.98647	0.939844
	1.6	0.970633	0.987447	0.971228		0.988035	1		0.978383	0.986604	0.956379	0.962009	0.777954	0.76686	0.889433	0.772407	0.781058	0.968479	0.986919	0.98647	0.939844
	1.65	0.970633	0.987447	0.978786		0.988035			0.978383	0.986604	0.960348	0.959709	0.798161	0.786274	0.889433	0.792218	0.80109	0.968479	0.986919	0.98647	0.943711
	1.7	0.970633	0.987447	0.978786		0.988035			0.978383	1	0.96567	0.964744	0.798161	0.795982	0.889433	0.797071	0.805998	0.968479	0.986919	0.98647	0.943711
	1.75	0.982327	0.987447	0.978786		0.988035			0.978383		0.967867	0.967606	0.798161	0.815396	0.889433	0.806778	0.815814	0.973084	0.986919	0.98647	0.951447
	1.8	0.982327	0.987447	0.982565		0.988035			0.978383		0.962252	0.969778	0.798161	0.815396	0.906215	0.806778	0.815814	0.977689	0.986919	1	0.955314
	1.85	0.983276	0.987447	0.982565		0.988035			1		0.964277	0.971081	0.798161	0.815396	0.939778	0.806778	0.815814	0.977689	0.986919		0.955314
	1.9	1	0.987447	0.982565		0.988035					0.966302	0.972383	0.798161	0.83481	0.95656	0.816485	0.82563	0.9869	0.986919		0.959182
	1.95		0.987447	0.982565		1					0.966302	0.975296	0.798161	0.83481	0.973342	0.816485	0.82563	0.971703	0.986919		0.966917
	2		0.987447	0.982565							0.968105	0.975296	0.808264	0.83481	0.973342	0.821537	0.830738	0.971703	0.986919		0.970785
	2.05		0.987447	0.982565							0.968105	0.976599	0.808264	0.854224	0.973342	0.831244	0.840554	0.971703	0.986919		0.970785
	2.1		0.987447	0.986344							0.971542	0.977468	0.818367	0.863931	0.973342	0.841149	0.85057	0.971703	0.986919		0.970785
	2.15		0.987447	0.986344							0.971542	0.978286	0.828471	0.873638	0.973342	0.851055	0.860586	0.971703	0.986919		0.970785
	2.2		0.987447	0.986344							0.973567	0.975326	0.838574	0.893053	0.973342	0.865813	0.87551	0.980913	0.986919		0.970785
	2.25		0.987447	0.986344							0.975201	0.975326	0.848677	0.90276	0.973342	0.875718	0.885526	0.980913	0.986919		0.970785
	2.3		0.987447	0.986344							0.980663	0.977797	0.85878	0.90276	0.973342	0.88077	0.890635	0.980913	0.986919		0.970785
	2.35		0.987447	0.986344							0.975933	0.975136	0.85878	0.912467	0.973342	0.885624	0.895543	0.985518	0.986919		0.970785
	2.4		0.987447	1							0.975933	0.975136	0.868884	0.931881	0.973342	0.900382	0.910467	0.985518	1		0.970785
	2.45		0.987447								0.97897	0.975136	0.889091	0.931881	0.973342	0.910486	0.920683	0.985518			0.970785
	2.5		0.987447								0.97897	0.975136	0.889091	0.931881	0.973342	0.910486	0.920683	0.985518			0.970785
	2.55		0.987447								0.97897	0.975136	0.889091	0.931881	0.973342	0.910486	0.920683	0.985518			0.970785
	2.6		0.987447								0.97897	0.977307	0.899194	0.941588	0.973342	0.920391	0.930699	0.985518			1
	2.65		1								0.97897	0.978543	0.899194	0.951295	0.973342	0.925244	0.935607	0.985518
	2.7										0.97897	0.974924	0.899194	0.951295	0.973342	0.925244	0.935607	0.985518
	2.75										0.97897	0.974924	0.899194	0.961002	0.973342	0.930098	0.940515	0.985518
	2.8										0.97897	0.974924	0.909297	0.970709	0.973342	0.940003	0.950531	0.985518
	2.85										0.97897	0.974924	0.9194	0.970709	0.973342	0.945055	0.955639	1
	2.9										0.97897	0.974924	0.9194	0.970709	0.973342	0.945055	0.955639
	2.95										0.981676	0.974924	0.929504	0.970709	0.973342	0.950106	0.960748
	3										0.984381	0.974924	0.929504	0.970709	0.973342	0.950106	0.960748
	3.05										0.984381	0.974924	0.929504	0.970709	0.973342	0.950106	0.960748
	3.1										0.984381	0.974924	0.929504	0.970709	0.973342	0.950106	0.960748
	3.15										0.984381	0.974924	0.929504	0.970709	0.973342	0.950106	0.960748
	3.2										0.984381	0.974924	0.929504	0.970709	0.973342	0.950106	0.960748
	3.25										0.984381	0.974924	0.929504	0.970709	0.973342	0.950106	0.960748
	3.3										0.984381	0.981438	0.939607	0.970709	0.973342	0.955158	0.965856
	3.35										0.984381	0.984695	0.939607	0.970709	0.973342	0.955158	0.965856
	3.4										0.984381	0.984695	0.939607	0.970709	0.973342	0.955158	0.965856
	3.45										0.984381	0.984695	0.939607	0.970709	0.973342	0.955158	0.965856
	3.5										0.984381	0.984695	0.939607	0.970709	0.973342	0.955158	0.965856
	3.55										0.984381	0.984695	0.939607	0.970709	0.973342	0.955158	0.965856
	3.6										0.984381	0.984695	0.939607	0.970709	0.973342	0.955158	0.965856
	3.65										0.984381	0.984695	0.939607	0.970709	1	0.955158	0.965856
	3.7										0.984381	0.986866	0.939607	0.970709		0.955158	0.965856
	3.75										0.984381	0.98361	0.939607	0.980416		0.960012	0.970764
	3.8										0.984381	0.98361	0.939607	0.980416		0.960012	0.970764
	3.85										0.987086	0.98361	0.939607	0.980416		0.960012	0.970764
	3.9										0.984049	0.98361	0.94971	0.980416		0.965063	0.975872
	3.95										0.984049	0.98361	0.94971	0.980416		0.965063	0.975872
	4										0.984049	0.98361	0.94971	0.980416		0.965063	0.975872
	4.05										0.984049	0.98361	0.94971	0.980416		0.965063	0.975872
	4.1										0.984049	0.98361	0.94971	0.980416		0.965063	0.975872
	4.15										0.984049	0.98361	0.959814	0.980416		0.970115	0.98098
	4.2										0.984049	0.98361	0.969917	0.980416		0.975167	0.986088
	4.25										0.984049	0.98361	0.969917	0.980416		0.975167	0.986088
	4.3										0.984049	0.98361	0.98002	0.980416		0.980218	0.986088
	4.35										0.984049	0.98361	0.98002	0.980416		0.980218	0.986088
	4.4										0.984049	0.98361	0.98002	0.980416		0.980218	0.986088
	4.45										1	0.98361	0.98002	0.980416		0.98527	0.986088
	4.5											0.98361	0.98002	0.980416		0.980416	1
	4.55											0.98361	0.98002	0.980416		0.980416
	4.6											0.98361	0.98002	0.980416		0.980416
	4.65											0.98361	0.98002	0.980416		0.980416
	4.7											0.98361	0.98002	0.980416		0.980416
	4.75											0.98361	1	0.980416		0.980416
	4.8											0.98361		0.980416		0.980416
	4.85											0.98361		0.980416		0.980416
	4.9											0.98361		0.980416		0.980416
	4.95											0.98361		0.980416		0.980416
	5											0.98361		0.980416		0.980416
	5.05											0.98361		0.980416		0.980416
	5.1											0.98361		0.980416		0.980416
	5.15											0.98361		0.980416		0.980416
	5.2											0.98361		0.980416		0.980416
	5.25											0.98361		0.980416		0.980416
	5.3											0.98361		0.980416		0.980416
	5.35											0.98361		0.980416		0.980416
	5.4											0.98361		0.980416		0.980416
	5.45											0.983161		0.980416		0.980416
	5.5											1		1		1
Amph1-frequency
	Vector					Full length					1-278					279-695
	A:Y1	A:Y2	A:Y3	A:Y4	A:Y5	B:Y1	B:Y2	B:Y3	B:Y4	B:Y5	C:Y1	C:Y2	C:Y3	C:Y4	C:Y5	D:Y1	D:Y2	D:Y3	D:Y4	D:Y5
Frequency (Hz)	3.4	3.12	1.47	2.15	2.5	1.76	5.12	3.18	1.88	1.38	1.22	0.81	0.89	0.84	0.41	0.83	1.31	2.51	2.03	1.71
