# Supplementary material for: Amphiphysin I cleavage by asparagine endopeptidase leads to tau hyperphosphorylation and synaptic dysfunction
Source: eLife. 2021 May 21;10:e65301. doi: 10.7554/eLife.65301 (PMC8139826; doi:10.7554/eLife.65301)
Supplement: Figure 4—source data 3. [file elife-65301-fig4-data3.xlsx]

## Sheet: Sheet1
Source data for Figure 4, panel d. AT8, AT100 and total-tau immunostaining of hippocampus in Tau P301S injected with AAVs encoding Amph Ⅰ FL, Amph Ⅰ (1-278), or Amph Ⅰ (279-695). Each row is an independent mouse.
Optical density score of AT8					Optical density score of AT100					Optical density score of total tau
Vector	Amph1 FL	Amph1 1-278	Amph1 279-695		Vector	Amph1 FL	Amph1 1-278	Amph1 279-695		Vector	Amph1 FL	Amph1 1-278	Amph1 279-695
1.24047	1.42641	2.21601	1.08744		1.7117	1.97588	1.99476	1.8228		1.24488	1.21122	1.25134	1.14756
1.06396	1.21651	2.43558	1.99403		1.03579	1.17992	2.00826	1.82282		1.1839	1.28027	1.22215	1.17267
1.93688	1.23323	2.21428	2.02097		1.02089	1.32915	2.43987	1.83948		1.16794	1.24311	1.2046	1.21766
1.46008	1.04323	2.33002	1.12724		1.08188	1.05331	2.62801	1.07054		1.16193	1.25883	1.16579	1.21856
