# Supplementary material for: Amphiphysin I cleavage by asparagine endopeptidase leads to tau hyperphosphorylation and synaptic dysfunction
Source: eLife. 2021 May 21;10:e65301. doi: 10.7554/eLife.65301 (PMC8139826; doi:10.7554/eLife.65301)
Supplement: Figure 4—source data 4. [file elife-65301-fig4-data4.xlsx]

## Sheet: Sheet1
Source data for Figure 4, panel f. Quantification of AT8 and AT100 immunostaining were analyzed by Image J. The fluorescence intensity was normalized to EGFP-vector group. Each row is an independent experiment.
AT8 mean fluorescence intensity (Normalized by Vector)					AT100 mean fluorescence intensity (Normalized by Vector)
Vector	Amph1 FL	Amph1 1-278	Amph1 279-695		Vector	Amph1 FL	Amph1 1-278	Amph1 279-695
1.41871	1.04165	3.18121	1.40345		1.00283	1.13733	2.33163	1.3846
1.45439	0.67096	1.49225	0.618334		1.13937	1.21841	1.42257	1.17171
0.811497	0.302552	1.51466	0.618291		1.2882	0.78045	1.36822	0.811431
0.557163	2.1133	2.60604	0.773821		0.694657	1.02179	1.49613	1.12587
0.758236	1.28919	2.32742	1.89738		0.874941	0.688581	1.72535	1.13084
