# Supplementary material for: Amphiphysin I cleavage by asparagine endopeptidase leads to tau hyperphosphorylation and synaptic dysfunction
Source: eLife. 2021 May 21;10:e65301. doi: 10.7554/eLife.65301 (PMC8139826; doi:10.7554/eLife.65301)
Supplement: Figure 5—source data 1. [file elife-65301-fig5-data1.xlsx]

## Sheet: Sheet1
Source data for Figure 5, panel b-e. Quantification of the immunoreactivity of AT8, AT100, CDK5, p-histone/histone. Each row is an independent experiment.
AT8 protein levels relative to Tau5					AT100 protein levels relative to Tau5					CDK5 protein levels relative to GAPDH					p-Histone/histone
Vector	Amph1 FL	Amph1 1-278	Amph1 279-695		Vector	Amph1 FL	Amph1 1-278	Amph1 279-695		Vector	Amph1 FL	Amph1 1-278	Amph1 279-695		Vector	Amph1 FL	Amph1 1-278	Amph1 279-695
0.826285	0.821234	1.1559	0.786886		0.329236	0.375493	0.937686	0.610718		1.10477	1.35088	1.07755	0.860464		0.319483	0.705043	1.20802	0.725759
0.849493	0.80541	1.13962	0.780068		0.300866	0.357451	0.993692	0.873145		0.970584	1.25043	0.981169	1.47174		0.515115	0.650228	1.18257	0.63249
1.04895	1.01014	1.38186	1.03476		0.63794	0.353147	1.03632	0.51042		0.759019	1.19135	1.19735	0.896723		0.40262	0.594026	1.13108	0.540354
0.820024	0.823419	1.15624	0.790157		0.3148	0.589186	1.00939	0.622867		1.16562	1.11559	1.26431	1.50748		0.894954	0.656423	1.18207	0.795186
