# Supplementary material for: Amphiphysin I cleavage by asparagine endopeptidase leads to tau hyperphosphorylation and synaptic dysfunction
Source: eLife. 2021 May 21;10:e65301. doi: 10.7554/eLife.65301 (PMC8139826; doi:10.7554/eLife.65301)
Supplement: Figure 5—source data 2. [file elife-65301-fig5-data2.xlsx]

## Sheet: Sheet1
Source data for Figure 5, panel g-h. Quantification of AT8, AT100 immunostaining . Each row is an independent experiment.
AT8 mean fluorescence intensity (Normalized by Vector)			AT100 mean fluorescence intensity (Normalized by Vector)
DMSO	CDK5 inhibitor		DMSO	CDK5 inhibitor
2.11949	0.245316		1.00446	0.480793
1.49822	0.250553		1.35047	0.085553
0.389417	0.078423		0.981352	0.36672
0.469121	0.216537		0.864084	0.539655
0.523749	0.02046		0.799633	0.644168
