# Supplementary material for: Amphiphysin I cleavage by asparagine endopeptidase leads to tau hyperphosphorylation and synaptic dysfunction
Source: eLife. 2021 May 21;10:e65301. doi: 10.7554/eLife.65301 (PMC8139826; doi:10.7554/eLife.65301)
Supplement: Figure 6—source data 1. [file elife-65301-fig6-data1.xlsx]

## Sheet: Sheet1
Source data for Figure 6, panel c. Quantification of synaptic density. Each row is an independent mouse.
Vector	Amph1 FL	Amph1 1-278	Amph1 279-695
23	30	20	25
22	44	19	19
30	36	13	13
13	39	13	22
25	42	16	23
