# Supplementary material for: Amphiphysin I cleavage by asparagine endopeptidase leads to tau hyperphosphorylation and synaptic dysfunction
Source: eLife. 2021 May 21;10:e65301. doi: 10.7554/eLife.65301 (PMC8139826; doi:10.7554/eLife.65301)
Supplement: Figure 6—source data 2. [file elife-65301-fig6-data2.xlsx]

## Sheet: Sheet1
Source data for Figure 6, panel e. Quantification of spine number. Each row is an independent mouse.
Vector	Amph1 FL	Amph1 1-278	Amph1 279-695
5	7	4	4
7	6	4	4
7	4	5	4
6	7	5	5
5	6	3	5
