# Supplementary material for: Amphiphysin I cleavage by asparagine endopeptidase leads to tau hyperphosphorylation and synaptic dysfunction
Source: eLife. 2021 May 21;10:e65301. doi: 10.7554/eLife.65301 (PMC8139826; doi:10.7554/eLife.65301)
Supplement: Figure 6—source data 3. [file elife-65301-fig6-data3.xlsx]

## Sheet: Sheet1
Source data for Figure 6, panel f. Morris water maze analysis as escape latency. Each column is an independent mouse.
Trial day	EGFP-Vector								EGFP-AMPH1-FL								EGFP-AMPH1-1-278								EGFP-AMPH1-279-695
	A:Y1	A:Y2	A:Y3	A:Y4	A:Y5	A:Y6	A:Y7	A:Y8	B:Y1	B:Y2	B:Y3	B:Y4	B:Y5	B:Y6	B:Y7	B:Y8	C:Y1	C:Y2	C:Y3	C:Y4	C:Y5	C:Y6	C:Y7	C:Y8	D:Y1	D:Y2	D:Y3	D:Y4	D:Y5	D:Y6	D:Y7	D:Y8
1	38.575	36.15	34.975	32.9	32.65	46.075	42.9	56.3	31.9	30.55	49.425	30.075	45.425	43.7	44.3	60	51.875	47.025	58.3	60	52.2	34.475	60	43.2	35.775	40.575	30.2	32.825	39.6	28.15	39.9	55.475
2	24.775	34.6	27.35	38.525	30.5	40.2	33.4	31.6	35.075	23.7	24.925	26.775	31.9	23.425	36.025	21.875	34.35	32.175	51.475	39.3	46	30.9	33.1	43.5	27.75	31.6	38.725	38.025	37.95	24.7	46.35	60
3	22.825	30.75	18.3	27.4	29.1333	28.8	21.6	19.125	20.95	26.85	19.575	22.1	26.125	20.475	36.2	43.1	31.175	27.375	15.2	31.9	49.9	32.1	28.3	33.5	21.25	22.95	22.975	25.1	19.8	22.2	34.9	28.3
4	18.8	11.575	12.925	10.025	24.125	19.6	8.8	9.15	15.825	23.025	13.625	10.3	13.25	16	26.6	15.6	25.2	28.625	38.6	25.8	33	20.8	24.4	32.15	14	20.2	20.325	24.85	8.25	15.45	30	20.65
