# Supplementary material for: Amphiphysin I cleavage by asparagine endopeptidase leads to tau hyperphosphorylation and synaptic dysfunction
Source: eLife. 2021 May 21;10:e65301. doi: 10.7554/eLife.65301 (PMC8139826; doi:10.7554/eLife.65301)
Supplement: Figure 6—source data 4. [file elife-65301-fig6-data4.xlsx]

## Sheet: Sheet1
Source data for Figure 6, panel g. Morris water maze analysis as escape latency in day 4. Each row is an independent mouse.
EGFP-Vector	EGFP-AMPH1-FL	EGFP-AMPH1-1-278	EGFP-AMPH1-279-695
18.8	15.825	25.2	14
11.575	23.025	28.625	20.2
12.925	13.625	38.6	20.325
10.025	10.3	25.8	24.85
24.125	13.25	33	8.25
19.6	16	20.8	15.45
8.8	26.6	24.4	30
9.15	15.6	32.15	20.65
