# Supplementary material for: Amphiphysin I cleavage by asparagine endopeptidase leads to tau hyperphosphorylation and synaptic dysfunction
Source: eLife. 2021 May 21;10:e65301. doi: 10.7554/eLife.65301 (PMC8139826; doi:10.7554/eLife.65301)
Supplement: Figure 6—source data 5. [file elife-65301-fig6-data5.xlsx]

## Sheet: Sheet1
Source data for Figure 6, panel h. Probe trial of Morris water maze test. The precentage time spent in target quadrant. Each row is one of the four trails of independent mouse.
mice	trials	EGFP-Vector	EGFP-AMPH1-FL	EGFP-AMPH1-1-278	EGFP-AMPH1-279-695
1	1	19.1667	17.3333	10.3333	17.3333
	2	19.5	17.5	5.33333	20.8333
	3	20.3333	17.6667	9.33333	21
	4	20.6667	18.5	10.6667	22.3333
2	1	21.1667	18.5	17	23
	2	21.3333	21.8333	17.6667	23.1667
	3	21.6667	21.8333	18	23.5
	4	22.6667	23.1667	18.3333	23.6667
3	1	23.3333	23.8333	18.6667	24.3333
	2	26.3333	22.5	18.8333	25.6667
	3	27.6667	22.5	19.1667	25.8333
	4	28.6667	25	19.3333	24
4	1	28.8333	26.6667	20.8333	24.5
	2	27.6667	27	24.6667	25.1667
	3	28.6667	27.6667	25	25.6667
	4	28.8333	28.3333	23.6667	20.6667
5	1	31.1667	28.8333	24.5	26.2
	2	33.8333	29.1667	25.3333	20.7
	3	42.5	35.6667	26.8333	24.7
	4	21	22	16	20
6	1	24.5	22.3	16.3333	22.3
	2	23.3	16.7	25.8	16.7
	3	22.3	17.8	21.5	24.5
	4	26.7	17.7	8.8	21
7	1	27	20.8	15.7	15.3
	2	16.8	46.3	25.3	11.5
	3	28.8	31.5	24.3	20.8
	4	30.3	30.8	25.3	13.8
8	1	32.3	33.7	18.8	22.7
	2	35.3	31	20.5	25.3
	3	26.5	19.8	16.7	28.3
	4	24.3	27.5	23.5	26.8
