# Supplementary material for: Amphiphysin I cleavage by asparagine endopeptidase leads to tau hyperphosphorylation and synaptic dysfunction
Source: eLife. 2021 May 21;10:e65301. doi: 10.7554/eLife.65301 (PMC8139826; doi:10.7554/eLife.65301)
Supplement: Figure 6—source data 6. [file elife-65301-fig6-data6.xlsx]

## Sheet: Sheet1
Source data for Figure 6, panel i. Swim speed of mice injected with AAVs encoding EGFP, EGFP-Amph Ⅰ FL, EGFP-Amph Ⅰ (1-278), and EGFP-Amph Ⅰ (279-695) . Each row is an independent mouse.
Vector	FL	1-278	279-695
183.5	241.75	197.5	210.25
197.25	175.25	201.25	197.5
179.25	259.25	180.5	205
257	194.5	230.25	191.75
247	210.25	222	220.75
191.25	216.5	216.25	237.25
215	242	258	221.5
237	241	237	207.5
