# Supplementary material for: Amphiphysin I cleavage by asparagine endopeptidase leads to tau hyperphosphorylation and synaptic dysfunction
Source: eLife. 2021 May 21;10:e65301. doi: 10.7554/eLife.65301 (PMC8139826; doi:10.7554/eLife.65301)
Supplement: Figure 6—source data 7. [file elife-65301-fig6-data7.xlsx]

## Sheet: Sheet1
Source data for Figure 6, panel j. Y maze analysis as time spent in new arms. Each row is an independent mouse.
Vector	Amph1-FL	Amph1-1-278	Amph1-279-695
111.5	130.3	62.1	66.7
132.7	173.1	58.2	103.7
111.4	87.1	86.9	92.7
68.3	132.1	81.2	68.8
137.9	80.1	92.4	104.6
100.3	90	88.4	84.2
93.5	97.2	101.4	78.6
106.5	120.4	74.5	97.3
