# Supplementary material for: Amphiphysin I cleavage by asparagine endopeptidase leads to tau hyperphosphorylation and synaptic dysfunction
Source: eLife. 2021 May 21;10:e65301. doi: 10.7554/eLife.65301 (PMC8139826; doi:10.7554/eLife.65301)
Supplement: Figure 6—source data 8. [file elife-65301-fig6-data8.xlsx]

## Sheet: Sheet1
Source data for Figure 6, panel k. The slope of fEPSP after HFS recorded on hippocampal slices. Shown traces are representative fEPSPs of 3 samples recorded before and after LTP induction. Each column is an independent mouse.
time	Vector			AMPH1-FL			AMPH1-1-278			AMPH1-279-695
	A:Y1	A:Y2	A:Y3	B:Y1	B:Y2	B:Y3	C:Y1	C:Y2	C:Y3	D:Y1	D:Y2	D:Y3
1.00022	100.828	103.544	94.2957	100.056	100.193	106.855	93.9529	97.0678	102.399	99.356	102.713	89.1244
3.00013	99.5998	101.121	92.3318	98.2938	100.937	100.222	99.3527	100.811	107.508	102.073	98.1168	88.468
5.00007	97.4803	92.2367	94.1574	105.801	105.274	108.468	95.6797	96.4641	106.095	96.421	93.2995	97.8783
7.00023	99.164	98.3446	93.7977	96.7008	106.464	100.506	103.024	95.8604	104.573	98.0509	99.1334	87.2096
9.00017	95.9154	94.155	95.6233	98.7454	116.579	103.952	98.2728	95.1365	102.943	94.1378	102.713	105.045
11.0001	99.4612	100.462	94.3787	97.745	104.175	102.541	97.4079	97.1889	105.552	100.878	92.0619	98.0151
13	99.5405	92.7879	96.0937	98.5004	97.9718	100.531	103.671	97.4302	101.421	96.203	97.3214	111.392
15.0002	101.521	105.202	95.7617	97.1182	94.7822	98.5052	94.8163	100.207	99.138	94.4641	106.161	94.5135
17.0001	102.948	100.814	96.4809	99.6978	106.377	99.2074	100.648	94.8952	98.1599	95.7685	95.8628	107.425
19	101.284	111.266	100.049	101.4	104.608	100.191	99.5679	99.2412	98.0509	100.225	106.249	94.0211
21.0002	102.433	121.63	97.3384	101.953	104.056	103.418	99.5679	98.5173	109.248	94.3551	98.6914	106.276
23.0001	100.491	106.437	97.7256	99.1039	109.186	96.6457	96.9762	94.0502	106.204	99.6816	106.912	96.8115
25	100.012	122.534	102.345	97.4385	113.211	103.647	102.159	100.69	106.748	97.7254	108.282	106.824
27.0002	100.287	110.12	104.862	94.826	101.305	101.073	103.671	98.5173	102.726	99.5733	94.3601	104.198
29.0001	99.2227	110.649	103.673	102.105	106.983	101.966	98.9196	100.207	104.573	98.3772	108.282	109.696
31.6667	267.355	248.177	245.02	240.777	241.38	293.141	164.435	153.463	203.603	188.721	200.454	185.987
33.9152	228.031	238.497	242.219	277.923	227.181	234.211	159.108	145.263	179.036	162.652	171.631	173.611
35.9151	200.724	210.802	220.851	261.489	233.857	215.004	149.317	136.178	146.135	144.007	161.894	171.274
37.915	196.722	208.508	219.588	243.827	216.159	188.675	145.285	134.588	143.924	142.484	163.062	170.81
39.9152	188.476	197.924	215.124	230.84	216.226	189.614	150.828	133.607	148.671	149.839	160.01	168.29
41.9151	190.479	196.469	211.275	212.925	206.912	188.769	155.435	134.372	150.483	151.313	159.221	167.445
43.915	180.996	200.901	211.091	200.969	186.348	218.318	144.925	128.378	143.743	149.077	160.104	167.318
45.9152	178.464	194.594	210.937	197.33	201.667	200.083	141.037	125.96	142.439	146.307	158.562	167.036
47.9151	182.822	198.409	207.735	182.677	178.181	210.094	136.141	123.716	143.091	151.896	161.176	166.206
49.9151	186.886	198.608	205.395	173.347	192.592	195.773	139.525	122.976	142.475	155.265	164.59	165.15
51.915	184.648	197.042	205.364	178.512	190.7	187.61	137.437	122.823	143.997	150.908	160.01	165.108
53.9152	192.128	197.152	204.686	169.885	200.648	194.699	143.125	125.045	146.243	153.645	164.637	165.079
55.9151	180.937	193.933	204.163	165.233	181.742	201.696	141.757	128.052	146.026	154.471	167.24	164.882
57.915	186.179	187.957	203.671	168.38	190.691	193.76	145.645	127.855	142.258	155.881	165.65	164.812
59.9152	185.473	193.779	202.778	170.774	190.8	194.282	147.733	129.468	145.374	150.519	169.748	164.038
61.9151	187.357	205.311	202.593	175.127	185.786	190.254	149.748	128.552	136.17	151.702	163.86	163.39
63.915	189.831	194.991	201.331	172.782	191.194	190.785	143.989	130.448	141.786	154.034	165.085	163.179
65.9152	195.014	209.236	201.269	171.307	186.853	201.288	138.445	129.228	139.649	160.012	162.53	162.982
67.9151	189.065	199.666	201.115	169.103	187.505	191.776	142.909	130.274	139.359	156.642	170.454	162.939
69.915	193.189	205.554	198.251	181.141	178.291	186.749	141.756	129.206	138.163	154.471	165.862	162.813
71.9152	202.082	204.495	197.759	173.611	174.004	180.489	145.213	127.376	134.902	155.427	170.795	162.714
73.9151	191.834	205.554	197.667	173.585	186.781	184.544	144.852	132.953	133.326	154.083	167.228	162.461
75.9151	188.3	193.668	195.327	171.112	192.5	184.729	143.34	134.696	132.112	153.921	165.815	161.7
77.915	199.726	204.385	194.28	169.752	193.789	188.768	145.5	135.153	130.264	157.647	168.123	161.56
79.9152	193.954	197.483	192.001	170.869	187.897	173.198	151.907	136.504	127.728	153.84	167.452	160.222
81.9151	192.381	185.081	191.509	169.199	180.731	179.695	151.188	136.264	126.169	158.019	169.312	158.955
83.915	199.142	183.581	190.677	168.23	186.285	175.162	148.452	134.042	126.025	160.903	168.193	157.941
85.9152	198.954	183.463	190.246	178.622	166.007	185.064	147.948	134.522	125.843	155.476	168.04	156.942
87.9151	198.642	183.629	190.154	176.07	186.003	175.252	156.155	139.314	123.85	156.091	169.653	155.59
89.915	194.886	182.732	189.723	178.502	175.219	175.553	149.316	137.898	122.546	161.081	171.808	153.591
