# Supplementary material for: Amphiphysin I cleavage by asparagine endopeptidase leads to tau hyperphosphorylation and synaptic dysfunction
Source: eLife. 2021 May 21;10:e65301. doi: 10.7554/eLife.65301 (PMC8139826; doi:10.7554/eLife.65301)
Supplement: Figure 6—source data 9. [file elife-65301-fig6-data9.xlsx]

## Sheet: Sheet1
Source data for Figure 6, panel l. Quantitative analyses for the average of normalized fEPSPs 70-90 min after HFS. Each row is an independent mouse.
time	Vector			AMPH1-FL			AMPH1-1-278			AMPH1-279-695
	A:Y1	A:Y2	A:Y3	B:Y1	B:Y2	B:Y3	C:Y1	C:Y2	C:Y3	D:Y1	D:Y2	D:Y3
69.915	193.189	205.554	198.251	181.141	178.291	186.749	141.756	129.206	138.163	154.471	165.862	162.813
71.9152	202.082	204.495	197.759	173.611	174.004	180.489	145.213	127.376	134.902	155.427	170.795	162.714
73.9151	191.834	205.554	197.667	173.585	186.781	184.544	144.852	132.953	133.326	154.083	167.228	162.461
75.9151	188.3	193.668	195.327	171.112	192.5	184.729	143.34	134.696	132.112	153.921	165.815	161.7
77.915	199.726	204.385	194.28	169.752	193.789	188.768	145.5	135.153	130.264	157.647	168.123	161.56
79.9152	193.954	197.483	192.001	170.869	187.897	173.198	151.907	136.504	127.728	153.84	167.452	160.222
81.9151	192.381	185.081	191.509	169.199	180.731	179.695	151.188	136.264	126.169	158.019	169.312	158.955
83.915	199.142	183.581	190.677	168.23	186.285	175.162	148.452	134.042	126.025	160.903	168.193	157.941
85.9152	198.954	183.463	190.246	178.622	166.007	185.064	147.948	134.522	125.843	155.476	168.04	156.942
87.9151	198.642	183.629	190.154	176.07	186.003	175.252	156.155	139.314	123.85	156.091	169.653	155.59
89.915	194.886	182.732	189.723	178.502	175.219	175.553	149.316	137.898	122.546	161.081	171.808	153.591
