# Supplementary material for: Amphiphysin I cleavage by asparagine endopeptidase leads to tau hyperphosphorylation and synaptic dysfunction
Source: eLife. 2021 May 21;10:e65301. doi: 10.7554/eLife.65301 (PMC8139826; doi:10.7554/eLife.65301)
Supplement: Figure 7—figure supplement 1—source data 1. [file elife-65301-fig7-figsupp1-data1.xlsx]

## Sheet: Sheet1
Source data for Figure 7-supplementary 1. Swim speed of mice injected with AAVs encoding EGFP-Amph Ⅰ FL and EGFP-Amph Ⅰ N278A. Each row is an independent mouse.
FL	N278A
241.75	209.5
175.25	218.25
259.25	191.25
194.5	212.75
210.25	240.75
216.5	222
242	221.25
241	221
