# Supplementary material for: Amphiphysin I cleavage by asparagine endopeptidase leads to tau hyperphosphorylation and synaptic dysfunction
Source: eLife. 2021 May 21;10:e65301. doi: 10.7554/eLife.65301 (PMC8139826; doi:10.7554/eLife.65301)
Supplement: Figure 7—source data 1. [file elife-65301-fig7-data1.xlsx]

## Sheet: Sheet1
Source data for Figure 7, panel c. Quantification of synaptic density. Each row is an independent mouse.
FL	N278A
31	33
36	64
25	44
38	45
25	38
