# Supplementary material for: Amphiphysin I cleavage by asparagine endopeptidase leads to tau hyperphosphorylation and synaptic dysfunction
Source: eLife. 2021 May 21;10:e65301. doi: 10.7554/eLife.65301 (PMC8139826; doi:10.7554/eLife.65301)
Supplement: Figure 7—source data 2. [file elife-65301-fig7-data2.xlsx]

## Sheet: Sheet1
Source data for Figure 7, panel d. AT8 immunostaining of hippocampus in Tau P301S injected with AAVs encoding Amph Ⅰ FL and Amph Ⅰ N278A.. Each row is an independent mouse.
FL	N278A
1.82675	1.08056
1.41636	1.13212
1.62928	1.08402
1.21978	1.05267
