# Supplementary material for: Amphiphysin I cleavage by asparagine endopeptidase leads to tau hyperphosphorylation and synaptic dysfunction
Source: eLife. 2021 May 21;10:e65301. doi: 10.7554/eLife.65301 (PMC8139826; doi:10.7554/eLife.65301)
Supplement: Figure 7—source data 3. [file elife-65301-fig7-data3.xlsx]

## Sheet: Sheet1
Source data for Figure 7, panel e. Probe trial of Morris water maze test. The precentage time spent in target quadrant. Each row is one of the four trails of independent mouse.
mice	trail	EGFP-AMPH1-FL	EGFP-AMPH1-N278A
1	1	17.3333	20.6667
	2	17.5	23
	3	17.6667	23
	4	18.5	23.5
2	1	18.5	24.3333
	2	21.8333	24.5
	3	21.8333	25.1667
	4	23.1667	27.8333
3	1	23.8333	30.1667
	2	22.5	30.1667
	3	22.5	31.5
	4	25	32.5
4	1	26.6667	33.1667
	2	27	33.8333
	3	27.6667	34.6667
	4	28.3333	36.6667
5	1	28.8333	37.8333
	2	29.1667	40.8333
	3	35.6667	41.3333
	4	22	24.5
6	1	22.3	24.3
	2	16.7	25.3
	3	17.8	26
	4	17.7	30.2
7	1	20.8	32.5
	2	46.3	33.2
	3	31.5	29.3
	4	30.8	25
8	1	33.7	31.7
	2	31	23.5
	3	19.8	29.7
	4	27.5	35.8
