# Supplementary material for: Amphiphysin I cleavage by asparagine endopeptidase leads to tau hyperphosphorylation and synaptic dysfunction
Source: eLife. 2021 May 21;10:e65301. doi: 10.7554/eLife.65301 (PMC8139826; doi:10.7554/eLife.65301)
Supplement: Figure 7—source data 4. [file elife-65301-fig7-data4.xlsx]

## Sheet: Sheet1
Source data for Figure 7, panel f. The slope of fEPSP after HFS recorded on hippocampal slices. Shown traces are representative fEPSPs of 3 samples recorded before and after LTP induction. Each column is an independent mouse.
time	AMPH1-FL			AMPH1-N278A
	A:Y1	A:Y2	A:Y3	B:Y1	B:Y2	B:Y3
1.00022	100.056	100.193	106.855	97.367	102.711	94.6022
3.00013	98.2938	100.937	100.222	97.6016	94.799	98.6623
5.00007	105.801	105.274	108.468	102.261	95.8745	94.1993
7.00023	96.7008	106.464	100.506	98.6741	93.8418	99.4228
9.00017	98.7454	116.579	103.952	100.484	94.782	97.9005
11.0001	97.745	104.175	102.541	101.925	94.2272	100.272
13	98.5004	97.9718	100.531	98.2149	93.1677	97.6913
15.0002	97.1182	94.7822	98.5052	98.7956	91.8819	102.044
17.0001	99.6978	106.377	99.2074	99.3119	94.6028	104.287
19	101.4	104.608	100.191	98.3439	95.4676	104.569
21.0002	101.953	104.056	103.418	101.7	98.9689	109.613
23.0001	99.1039	109.186	96.6457	100.28	96.0159	109.5
25	97.4385	113.211	103.647	100.473	97.5397	111.031
27.0002	94.826	101.305	101.073	101.764	100.876	107.481
29.0001	102.105	106.983	101.966	101.022	100.272	118.929
31.6667	240.777	241.38	293.141	298.493	241.349	256.219
33.9152	277.923	227.181	234.211	253.205	207.272	225.167
35.9151	261.489	233.857	215.004	212.14	190.897	201.056
37.915	243.827	216.159	188.675	207.623	179.972	190.45
39.9152	230.84	216.226	189.614	204.961	181.1	192.556
41.9151	212.925	206.912	188.769	214.946	176.341	186.99
43.915	200.969	186.348	218.318	206.97	170.603	188.419
45.9152	197.33	201.667	200.083	207.477	179.849	176.46
47.9151	182.677	178.181	210.094	212.597	180.054	184.734
49.9151	173.347	192.592	195.773	183.438	175.13	189.849
51.915	178.512	190.7	187.61	177.488	179.162	184.659
53.9152	169.885	200.648	194.699	170.587	190.184	196.317
55.9151	165.233	181.742	201.696	178.961	180.49	196.167
57.915	168.38	190.691	193.76	172.9	187.693	186.84
59.9152	170.774	190.8	194.282	173.089	184.196	190.976
61.9151	175.127	185.786	190.254	176.685	180.705	187.742
63.915	172.782	191.194	190.785	172.278	191.087	186.614
65.9152	171.307	186.853	201.288	174.892	187.877	180.672
67.9151	169.103	187.505	191.776	172.844	184.543	180.898
69.915	181.141	178.291	186.749	180.2	187.637	171.646
71.9152	173.611	174.004	180.489	176.836	192.265	188.119
73.9151	173.585	186.781	184.544	179.161	194.334	181.5
75.9151	171.112	192.5	184.729	178.688	191.751	178.19
77.915	169.752	193.789	188.768	183.423	185.583	171.947
79.9152	170.869	187.897	173.198	186.068	189.012	184.357
81.9151	169.199	180.731	179.695	190.752	188.26	178.04
83.915	168.23	186.285	175.162	193.24	188.004	179.769
85.9152	178.622	166.007	185.064	205.765	188.074	168.863
87.9151	176.07	186.003	175.252	201.637	191.917	190.45
89.915	178.502	175.219	175.553	199.707	189.939	174.955
