# Supplementary material for: Amphiphysin I cleavage by asparagine endopeptidase leads to tau hyperphosphorylation and synaptic dysfunction
Source: eLife. 2021 May 21;10:e65301. doi: 10.7554/eLife.65301 (PMC8139826; doi:10.7554/eLife.65301)
Supplement: Figure 7—source data 5. [file elife-65301-fig7-data5.xlsx]

## Sheet: Sheet1
Source data for Figure 7, panel g. Quantitative analyses for the normalized fEPSPs 70-90 min after HFS. Each row is an independent mouse.
time	AMPH1-FL			AMPH1-N278A
	A:Y1	A:Y2	A:Y3	B:Y1	B:Y2	B:Y3
71.9152	173.611	174.004	180.489	176.836	192.265	188.119
73.9151	173.585	186.781	184.544	179.161	194.334	181.5
75.9151	171.112	192.5	184.729	178.688	191.751	178.19
77.915	169.752	193.789	188.768	183.423	185.583	171.947
79.9152	170.869	187.897	173.198	186.068	189.012	184.357
81.9151	169.199	180.731	179.695	190.752	188.26	178.04
83.915	168.23	186.285	175.162	193.24	188.004	179.769
85.9152	178.622	166.007	185.064	205.765	188.074	168.863
87.9151	176.07	186.003	175.252	201.637	191.917	190.45
89.915	178.502	175.219	175.553	199.707	189.939	174.955
