# Supplementary material for: Amphiphysin I cleavage by asparagine endopeptidase leads to tau hyperphosphorylation and synaptic dysfunction
Source: eLife. 2021 May 21;10:e65301. doi: 10.7554/eLife.65301 (PMC8139826; doi:10.7554/eLife.65301)
Supplement: Supplementary file 1. [file elife-65301-supp1.xlsx]

## Sheet: Sheet1
Primary Neuropathologic Diagnosis	Braak Stage	PMI (hr)	Age at Death	Disease Duration (years)	ApoE	Sex
Control	0	3	52	N/A	E3/4	F
Control	0	6	59	N/A	E2/3	M
Control	0	6	65	N/A	E3/3	F
Control	0	9	70	N/A	E2/3	M
Control	I	2.5	70	N/A	E3/3	M
AD	VI	5.5	54	9	E3/3	M
AD	VI	6	62	10	E3/3	F
AD	V	4.5	55	3	E3/4	F
AD	VI	6	62	7	E2/3	M
AD	VI	9	64	8	E3/4	M
AD	IV	15	71	2.5	E3/4	M
AD	V	22	91	12	E3/3	M
AD	VI	17	71	8	E3/4	M
AD	VI	13	87	13	E3/4	F
AD	IV	19.5	63	4	E3/3	M
AD	V	12	81	12	E3/4	F
